# Supplementary material for: Trash to Treasure: How Insect Protein and Waste Containers Can Improve the Environmental Footprint of Mosquito Egg Releases
Source: MDPI journal article supplement (doi:10.3390/pathogens11030373), 2022-03-18
Supplement: s1 [file s1]

**Table S1.** Mosquito strains and corresponding experiments.

| Experiment                               | Mosquito Line      |
|------------------------------------------|--------------------|
| Diet and waste container lab experiments | Aus <i>w</i> Mel   |
| Kiribati field test                      | Kiribati wild-type |

**Table S2.** Liquid diet feeding regime followed per 150 larvae.

| Days Post-hatch | Number of Tetramin Tablets | Amount of Liquid Food (beef liver powder-, cricket- or black soldier fly-based) |
|-----------------|----------------------------|---------------------------------------------------------------------------------|
| 0               | 0.5 tablets                | 4.13 $\mu$ L                                                                    |
| 1               | 0                          | 413 $\mu$ L in morning and 413 $\mu$ L in evening                               |
| 2               | 0                          | 413 $\mu$ L                                                                     |
| 3               | 0                          | 1.65 mL                                                                         |
| 4               | 0.5 tablets                | 1.65 mL                                                                         |
| 5               | 0                          | 1.23 mL                                                                         |
| 6               | 0                          | 413 $\mu$ L                                                                     |
| 7               | 0.25 tablets               | 413 $\mu$ L                                                                     |

**Table S3.** qPCR primer and probe sequences. Reference gene *Ribosomal Protein S17 (RpS17)* and target gene *Wolbachia surface protein (wsp)* [44].

| Primer Name      | Sequence                                 |
|------------------|------------------------------------------|
| Rps17_TaqM_Probe | CAGGAGGAGGAACGTGAGCGCAG<br>(FAM-BHQ1)    |
| wspTM-LC640      | LC640-TCCTTTGGAACCCGCTGTGAATGA-iowaBlack |
| wspTM-2F         | CATTGGTGTGTTGTTGGTG                      |
| wspTM-2R         | ACACCAGCTTTTACTTGACCAG                   |
| Rps17_TaqM_FW    | TCCGTGGTATCTCCATCAAGCT                   |
| Rps17_TaqM_RV    | CACTTCCGGCACGTAGTTGTC                    |

**Table S4.** Statistical indicators for all statistical tests.

| Figure | Measurement                      | Statistical test | Degrees of Freedom | F-statistic | Chi-squared | P-value                |
|--------|----------------------------------|------------------|--------------------|-------------|-------------|------------------------|
| 1.a    | Emergence rate                   | ANOVA            | 3                  | 4.0625      | na          | 0.0253                 |
| 1.b    | Wing Length                      | ANOVA            | 3                  | 6.985       | na          | 0.0253                 |
| 1.c    | Wolbachia density                | Kruskal-Wallis   | na                 | na          | 3.131       | 0.3719                 |
| 2.a    | Hatch rate - Fly test            | ANOVA            | 1                  | 3.3569      | na          | 0.0794                 |
| 2.a    | Hatch rate - Cricket test        | ANOVA            | 1                  | 1.3843      | na          | 0.2509                 |
| 2.b    | Emergence rate - Fly test        | ANOVA            | 1                  | 6.0118      | na          | 0.0219                 |
| 2.b    | Emergence rate - Cricket test    | ANOVA            | 1                  | 0.581       | na          | 0.4634                 |
| 2.c    | Wing length - Fly test           | Mann-Whitney     | na                 | na          | na          | 0.2268                 |
| 2.c    | Wing length - Cricket test       | Mann-Whitney     | na                 | na          | na          | 0.7719                 |
| 2.d    | Wolbachia density - Fly test     | Mann-Whitney     | na                 | na          | na          | 0.0151                 |
| 2.d    | Wolbachia density - Cricket test | Mann-Whitney     | na                 | na          | na          | $5.65 \times 10^{-14}$ |
| 3.a    | Emergence rate                   | ANOVA            | 3                  | 4.0625      | na          | 0.0253                 |
| 3.b    | Wing Length                      | ANOVA            | 3                  | 6.985       | na          | 0.0003                 |
| 3.c    | Wolbachia density                | Kruskal-Wallis   | 4                  | na          | 8.3471      | 0.0797                 |
| 4.a    | Emergence rate                   | ANOVA            | 4                  | 0.8384      | na          | 0.5249                 |
| 4.b    | Mosquito death                   | ANOVA            | 4                  | 0.542       | na          | 0.708                  |
| S2.a   | Emergence rate                   | Kruskal-Wallis   | 4                  | na          | 1.4943      | 0.8276                 |
| S2.b   | Wing Length                      | ANOVA            | 4                  | 1.475       | na          | 0.218                  |
| S2.c   | Wolbachia density                | Kruskal-Wallis   | 4                  | na          | 8.3356      | 0.08                   |

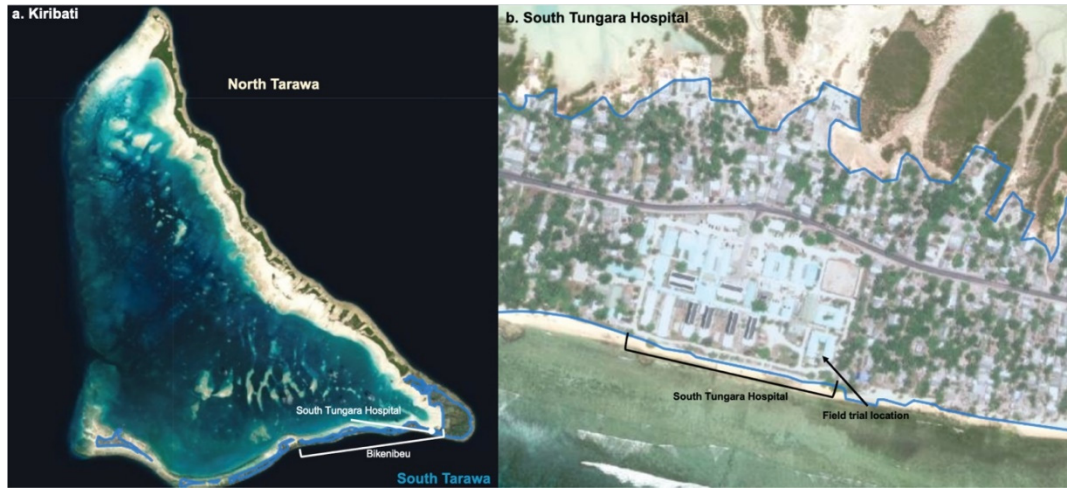

**Figure S1.** Map of field trial location **a.** Kiribati, North and South Tarawa, and **b.** South Tungara hospital.

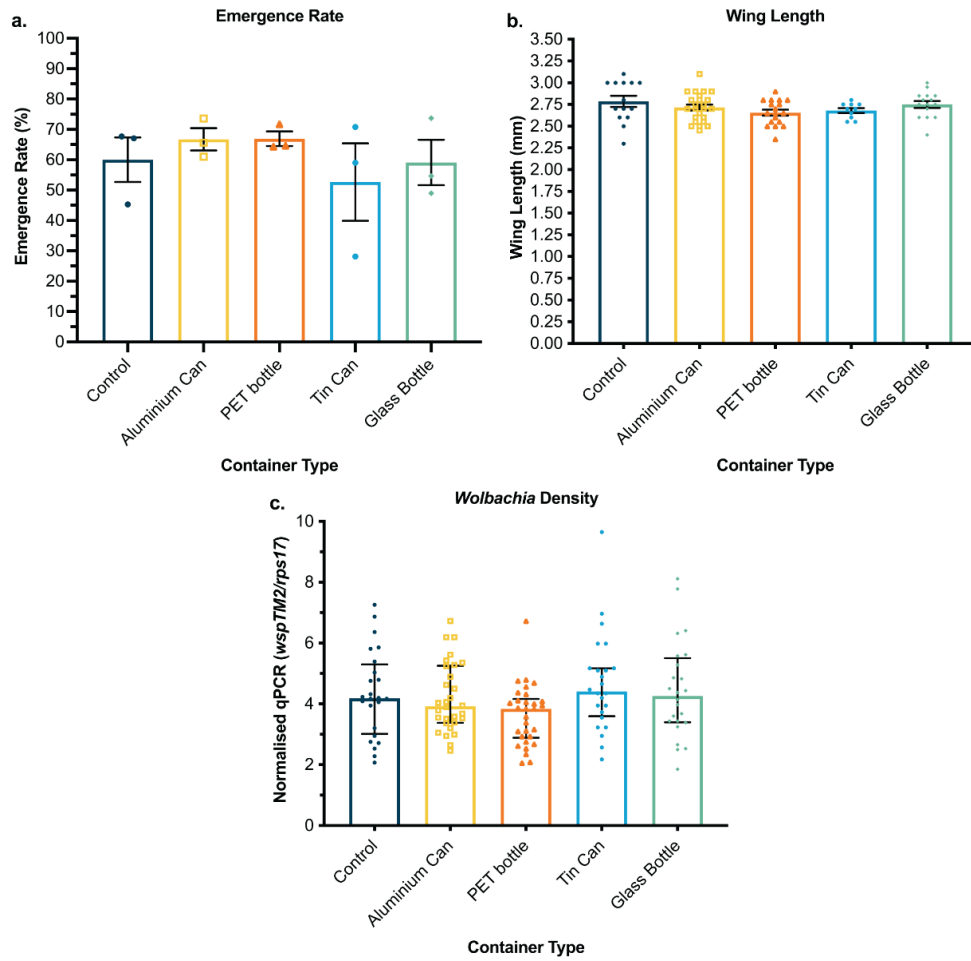

**Figure S2.** Development and adult fitness comparison between *wMel*-infected *Ae. aegypti* mosquitoes reared in five different containers. Aus *wMel* *Ae. aegypti* eggs were fed cricket-based diet inside of capsules. **(a)** Emergence rate **(b)** Wing length and **(c)** *Wolbachia* densities are shown. Each data point represents one cup (emergence), one wing from an individual mosquito (wing length) or one mosquito (*Wolbachia* density). Ordinary one-way analysis of variance was performed on the dataset, followed by Tukey's pairwise comparison test, or Kruskal-Wallis test for *Wolbachia* density. No significant differences were detected. Error bars represent standard error of the mean.

| Strategy 1: Aluminium cans, distributed through churches (community-led)                            |       |          | Strategy 2: Cardboard containers, distributed through churches (community-led)                      |       |          |
|-----------------------------------------------------------------------------------------------------|-------|----------|-----------------------------------------------------------------------------------------------------|-------|----------|
| Steps                                                                                               | Staff | Vehicles | Steps                                                                                               | Staff | Vehicles |
| 1 Purchase containers from Kiribati recycling company                                               | 0     | 0        | 1 Purchase and import cardboard containers into Kiribati                                            | 0     | 0        |
| 2 Transport containers from recycling facility to onsite office location (Tungara Central Hospital) | 4     | 2        | 2 Distribute containers and capsules to churches for distribution amongst the community             | 6     | 3        |
| 3 Purchase labels and place on containers                                                           | 2     | 0        | 3 Conduct community engagement activities to reinforce messaging and check correct implementation   | 2     | 1        |
| 4 Distribute cans and capsules to churches for distribution amongst the community                   | 6     | 3        | 4 Transport capsule fortnightly to churches for distribution to the community                       | 4     | 2        |
| 5 Conduct community engagement activities to reinforce messaging and check correct implementation   | 2     | 1        | 5 After completion, inform participants, via the church, to dispose of containers in landfill waste | 1     | 0        |
| 6 Transport capsule fortnightly to churches for distribution to the community                       | 4     | 2        |                                                                                                     |       |          |
| 7 After completion, inform participants, via the church, to recycle cans                            | 1     | 0        |                                                                                                     |       |          |

  

| Strategy 3: Aluminium cans, distributed directly to the community (staff-led)                       |       |          | Strategy 4: Cardboard containers, distributed directly to the community (staff-led)                    |       |          |
|-----------------------------------------------------------------------------------------------------|-------|----------|--------------------------------------------------------------------------------------------------------|-------|----------|
| Steps                                                                                               | Staff | Vehicles | Steps                                                                                                  | Staff | Vehicles |
| 1 Purchase containers from Kiribati recycling facility                                              | 0     | 0        | 1 Purchase and import cardboard containers into Kiribati                                               | 0     | 0        |
| 2 Transport containers from recycling facility to onsite office location (Tungara Central Hospital) | 4     | 2        | 4 Distribute containers and capsules directly to houses, completing 5 rounds of releases over 10 weeks | 18    | 9        |
| 3 Purchase labels and place on containers                                                           | 2     | 1        | 5 During final releases, inform participants that they can dispose of containers in landfill waste     | 1     | 0        |
| 4 Distribute cans and capsules directly to houses, completing 5 rounds of releases over 10 weeks    | 18    | 9        |                                                                                                        |       |          |
| 5 During final releases, inform participants that they can recycle their cans                       | 1     | 0        |                                                                                                        |       |          |

**Figure S3.** End-to-end process for each release strategy, including staff and vehicle requirements.
